# Supplementary material for: Structure-based membrane dome mechanism for Piezo mechanosensitivity
Source: eLife journal article supplement (doi:10.7554/elife.33660), 2017-12-12
Supplement: supp [file elife-33660-supp-v1.zip]

Archive with 11 entries (11 files):
- elife_poa_e33660_Figure_3_figure_supplement_3.tif
- elife_poa_e33660_Figure_3_figure_supplement_2.tif
- elife_poa_e33660_Figure_2_figure_supplement_3.tif
- elife_poa_e33660_Figure_7_figure_supplement_1.tif
- elife_poa_e33660_Figure_4_figure_supplement_1.tif
- elife_poa_e33660_Figure_2_figure_supplement_1.tif
- elife_poa_e33660_Transparent_Reporting_File.pdf
- elife_poa_e33660_Figure_6_figure_supplement_1.tif
- elife_poa_e33660_Figure_5_figure_supplement_1.tif
- elife_poa_e33660_Figure_2_figure_supplement_2.tif
- elife_poa_e33660_Figure_3_figure_supplement_1.tif
