# Supplementary figures and images for: Structure-based membrane dome mechanism for Piezo mechanosensitivity
Source: eLife journal article supplement (doi:10.7554/elife.33660), 2017-12-12

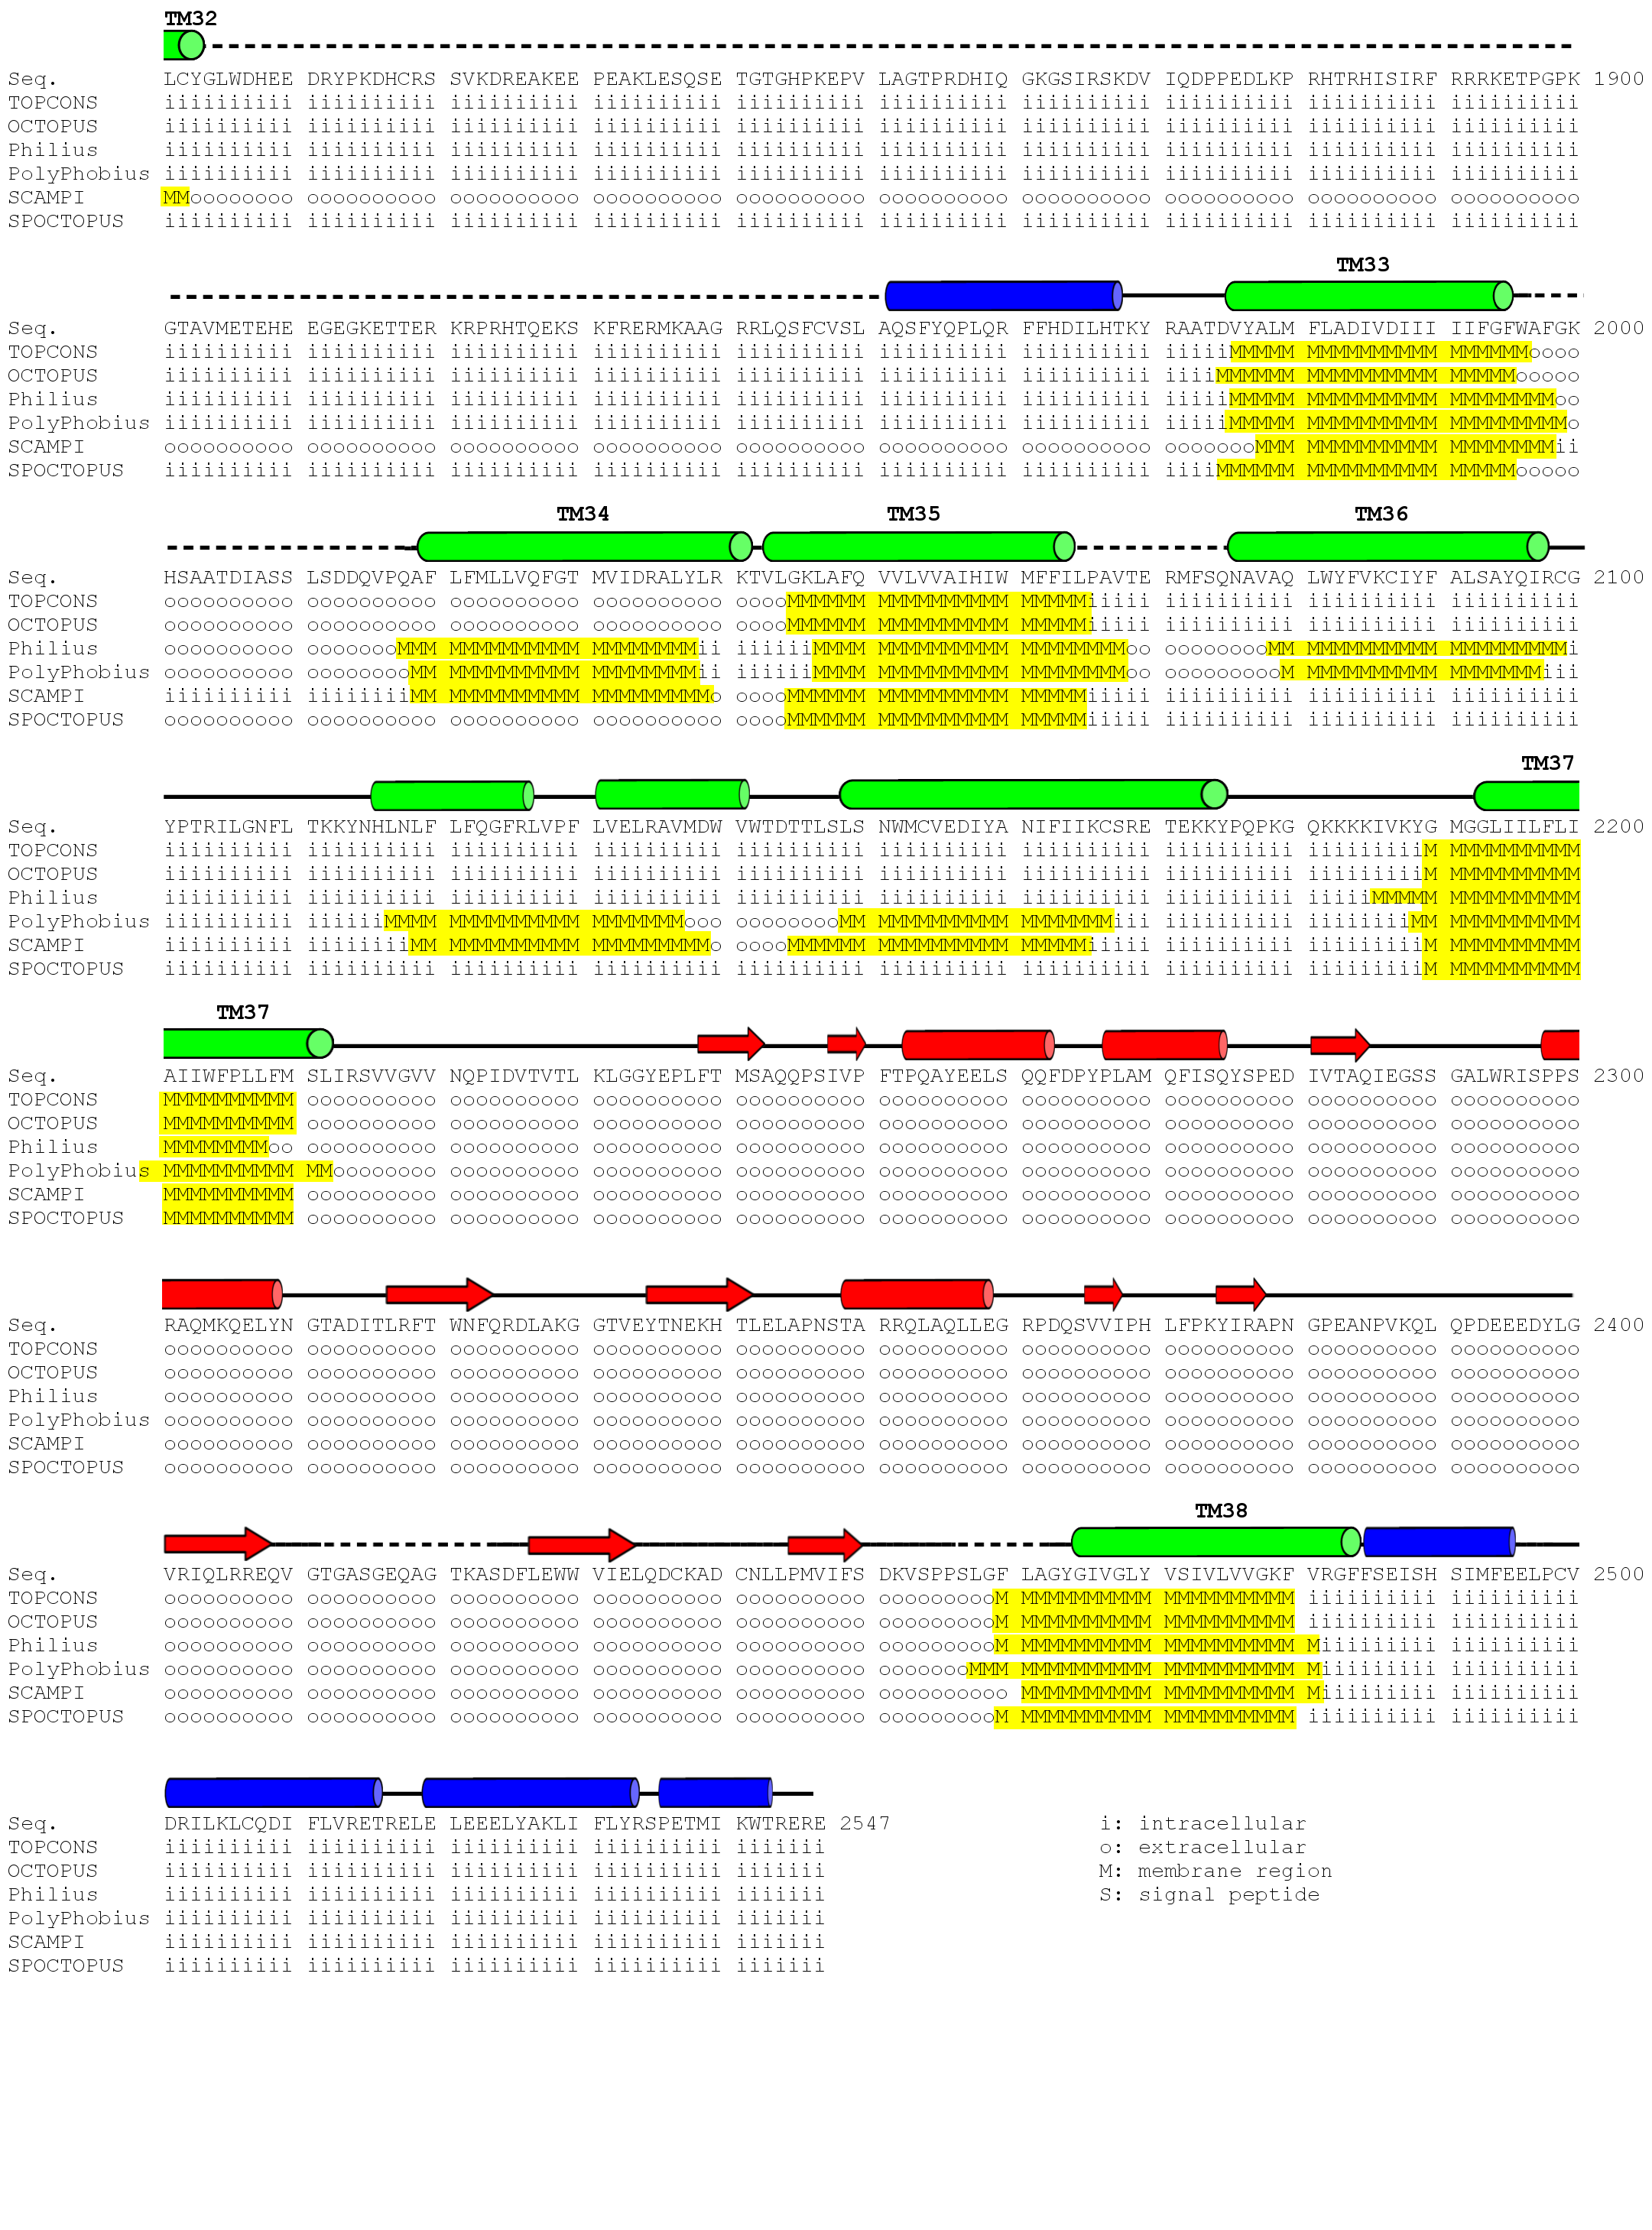

Supplement: supp [file elife-33660-supp-v1.zip › elife_poa_e33660_Figure_3_figure_supplement_3.tif]

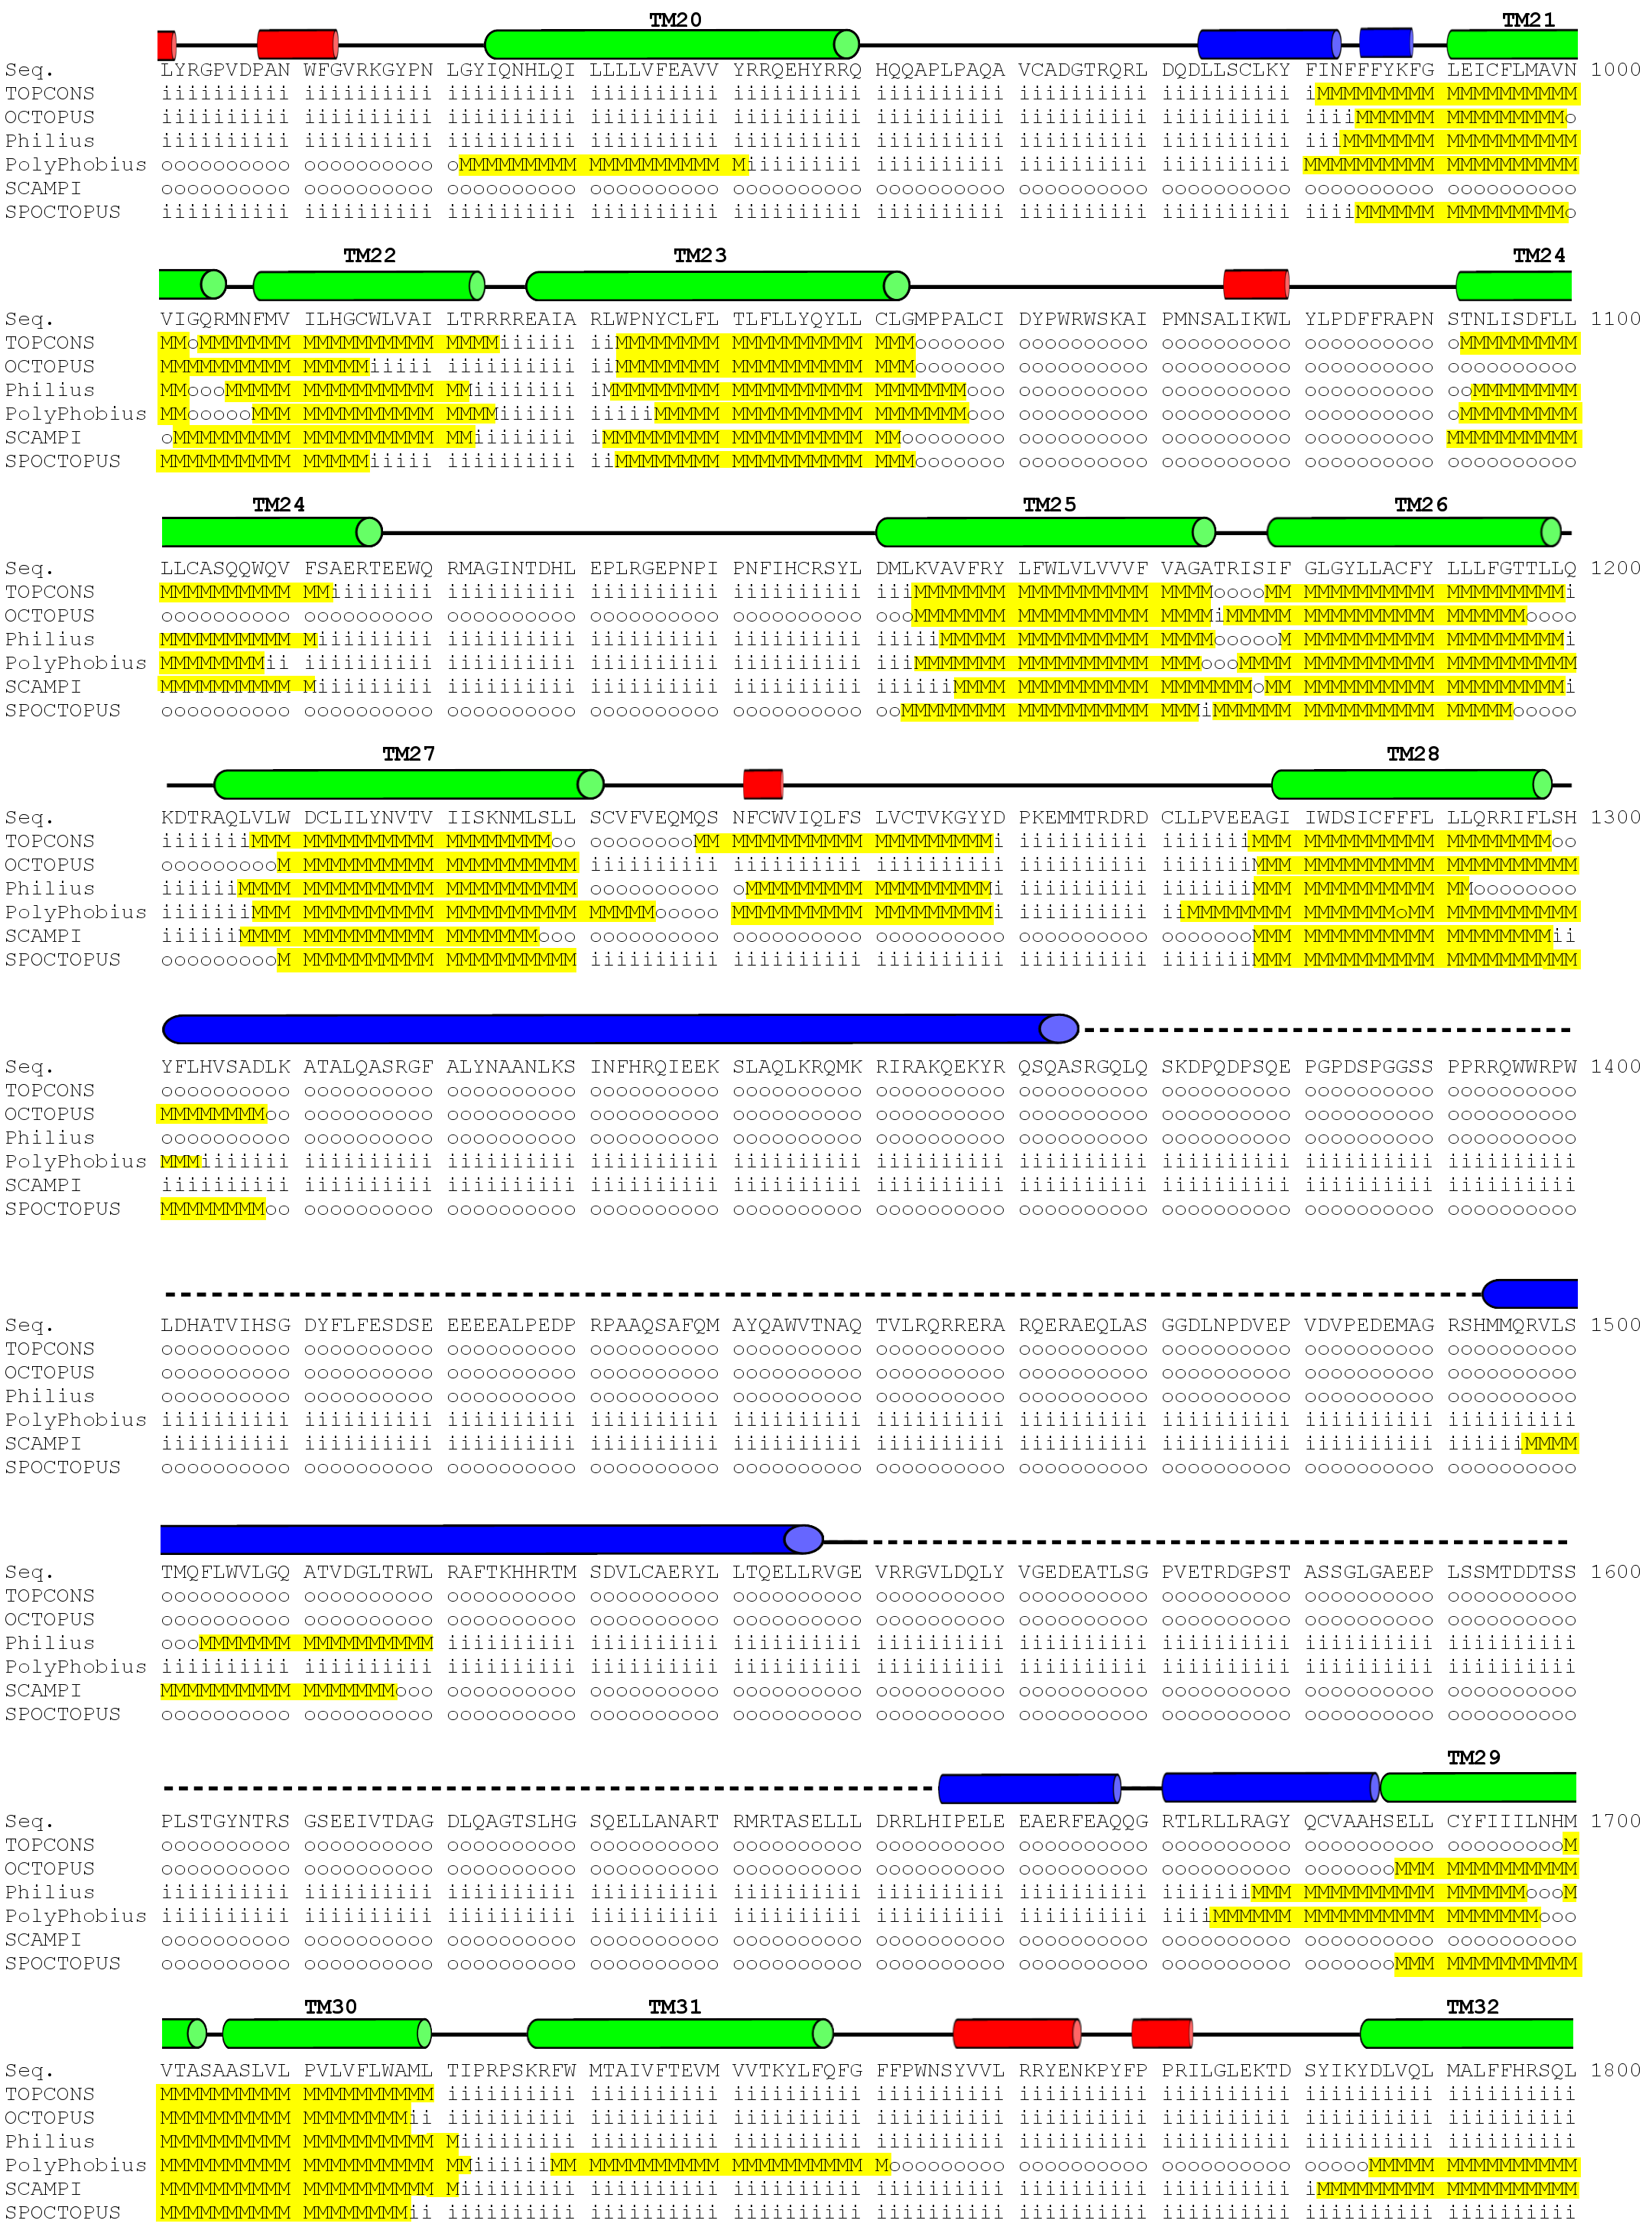

Supplement: supp [file elife-33660-supp-v1.zip › elife_poa_e33660_Figure_3_figure_supplement_2.tif]

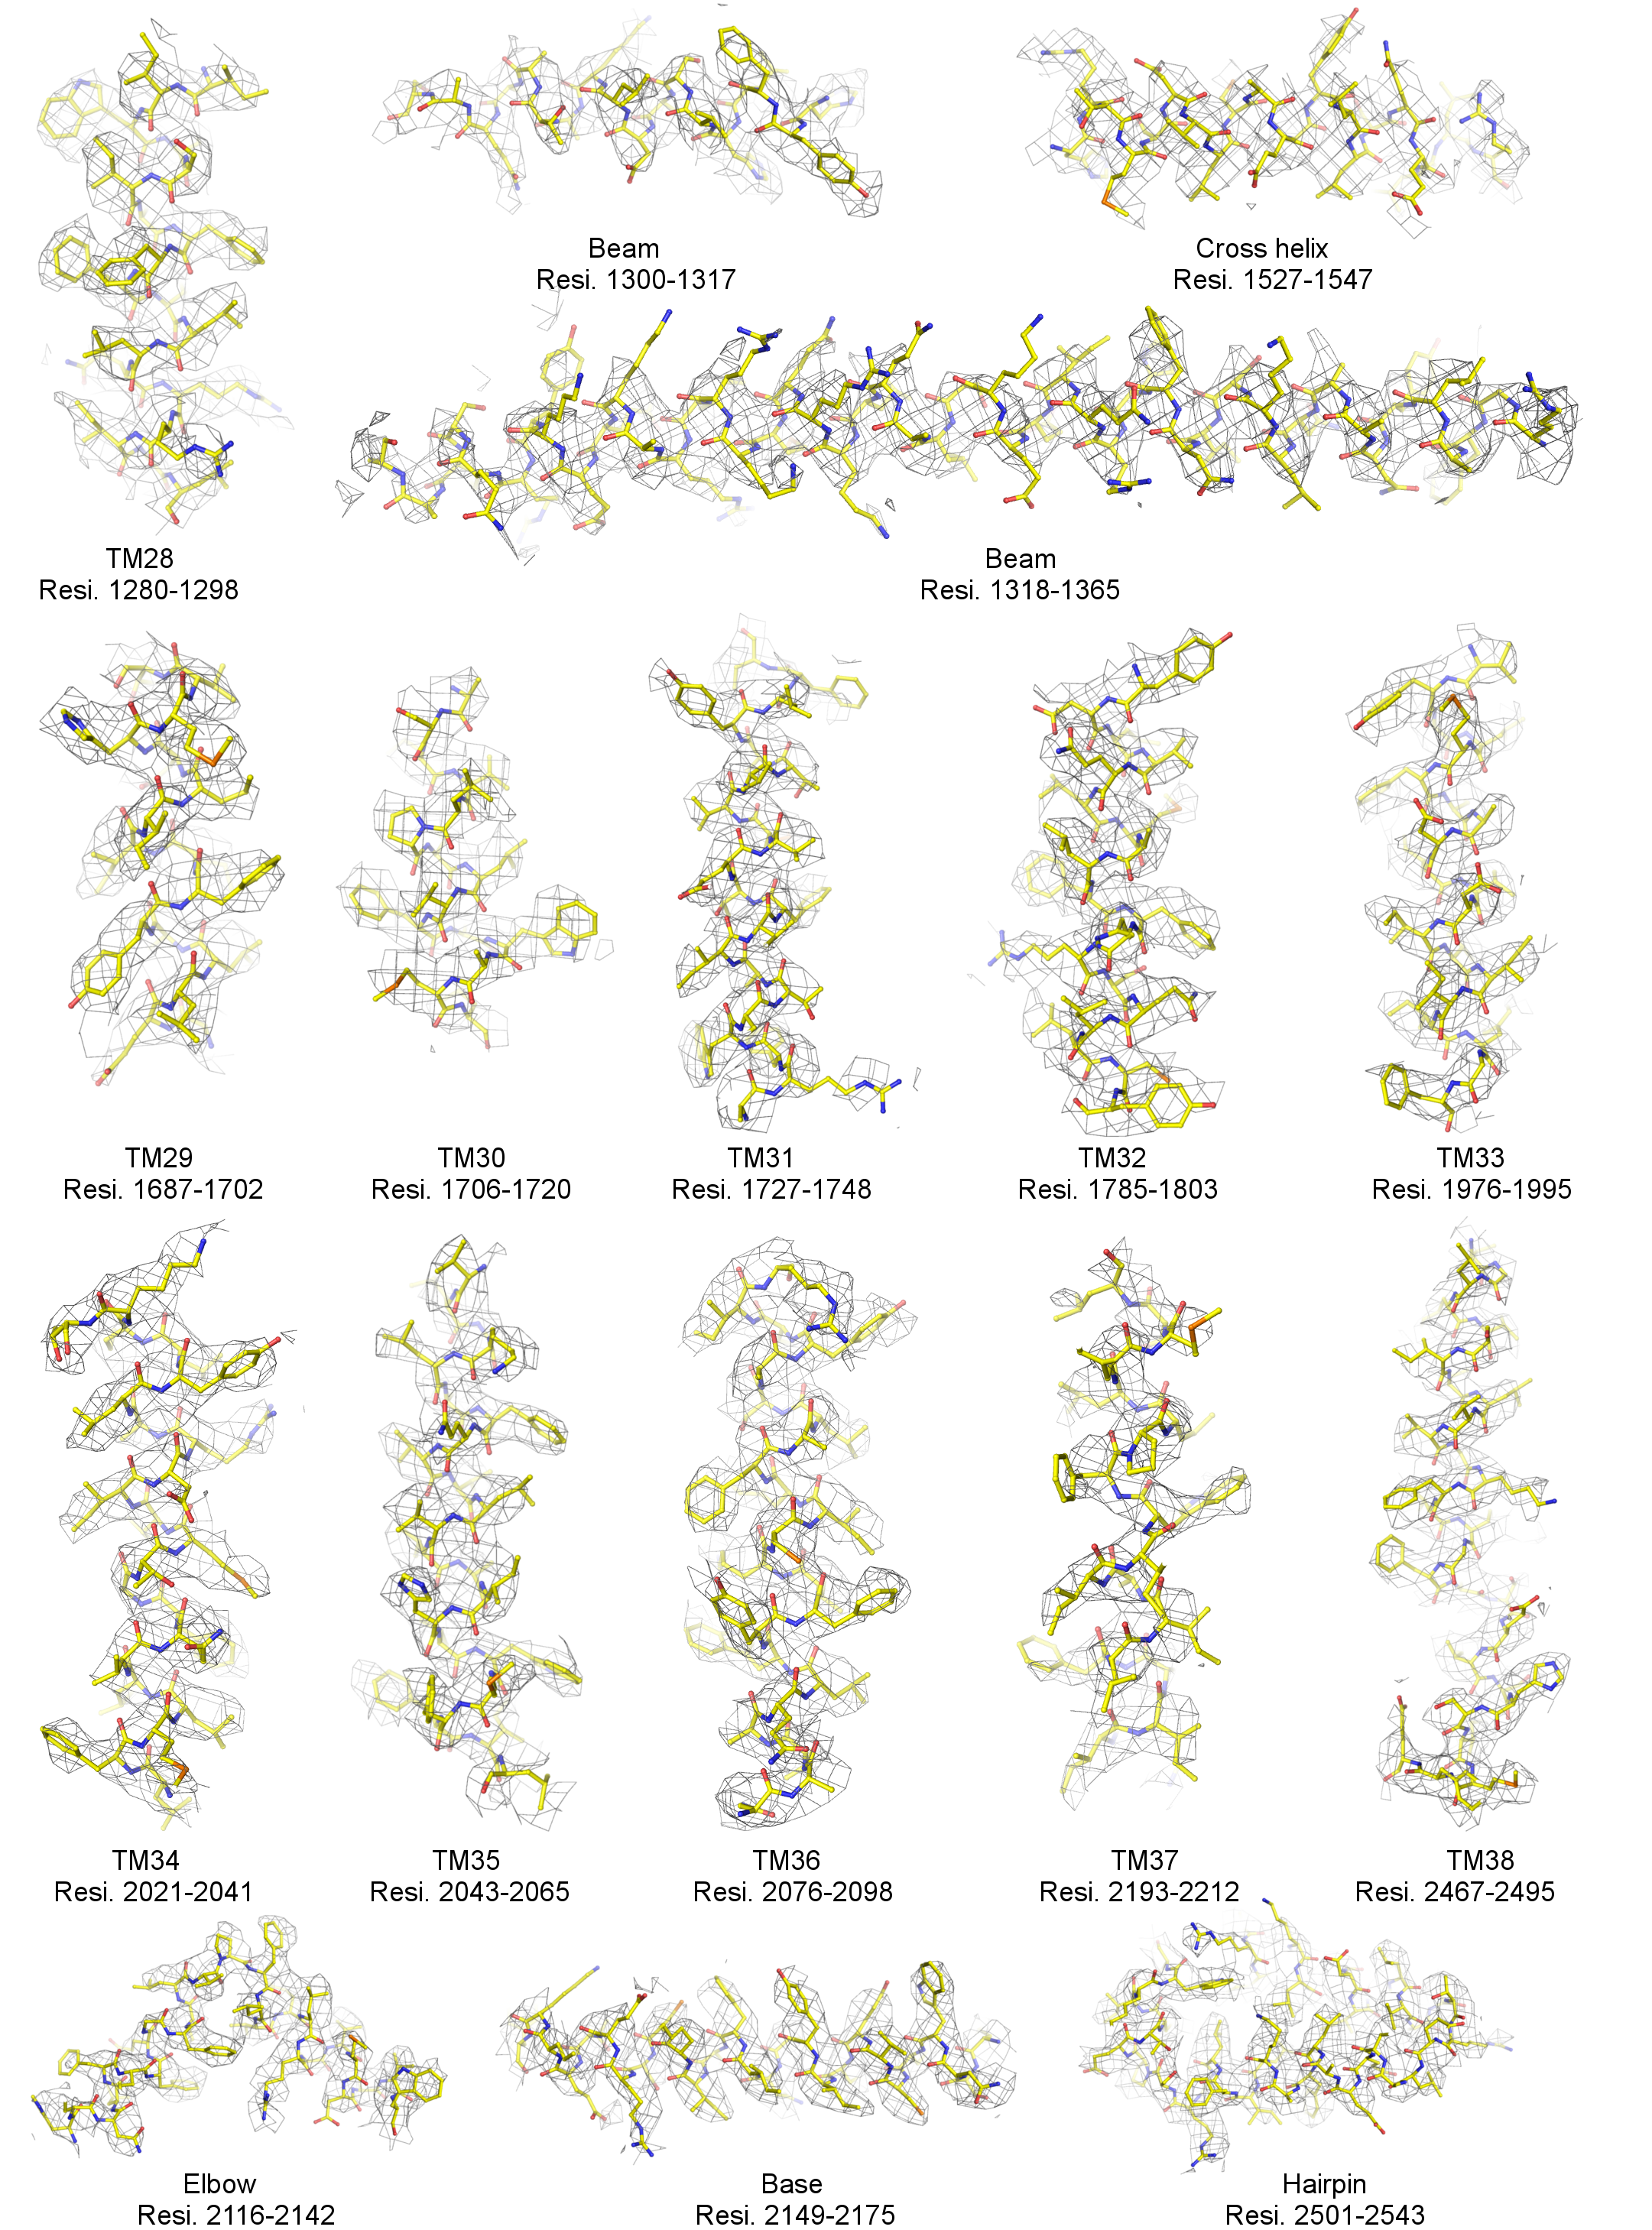

Supplement: supp [file elife-33660-supp-v1.zip › elife_poa_e33660_Figure_2_figure_supplement_3.tif]

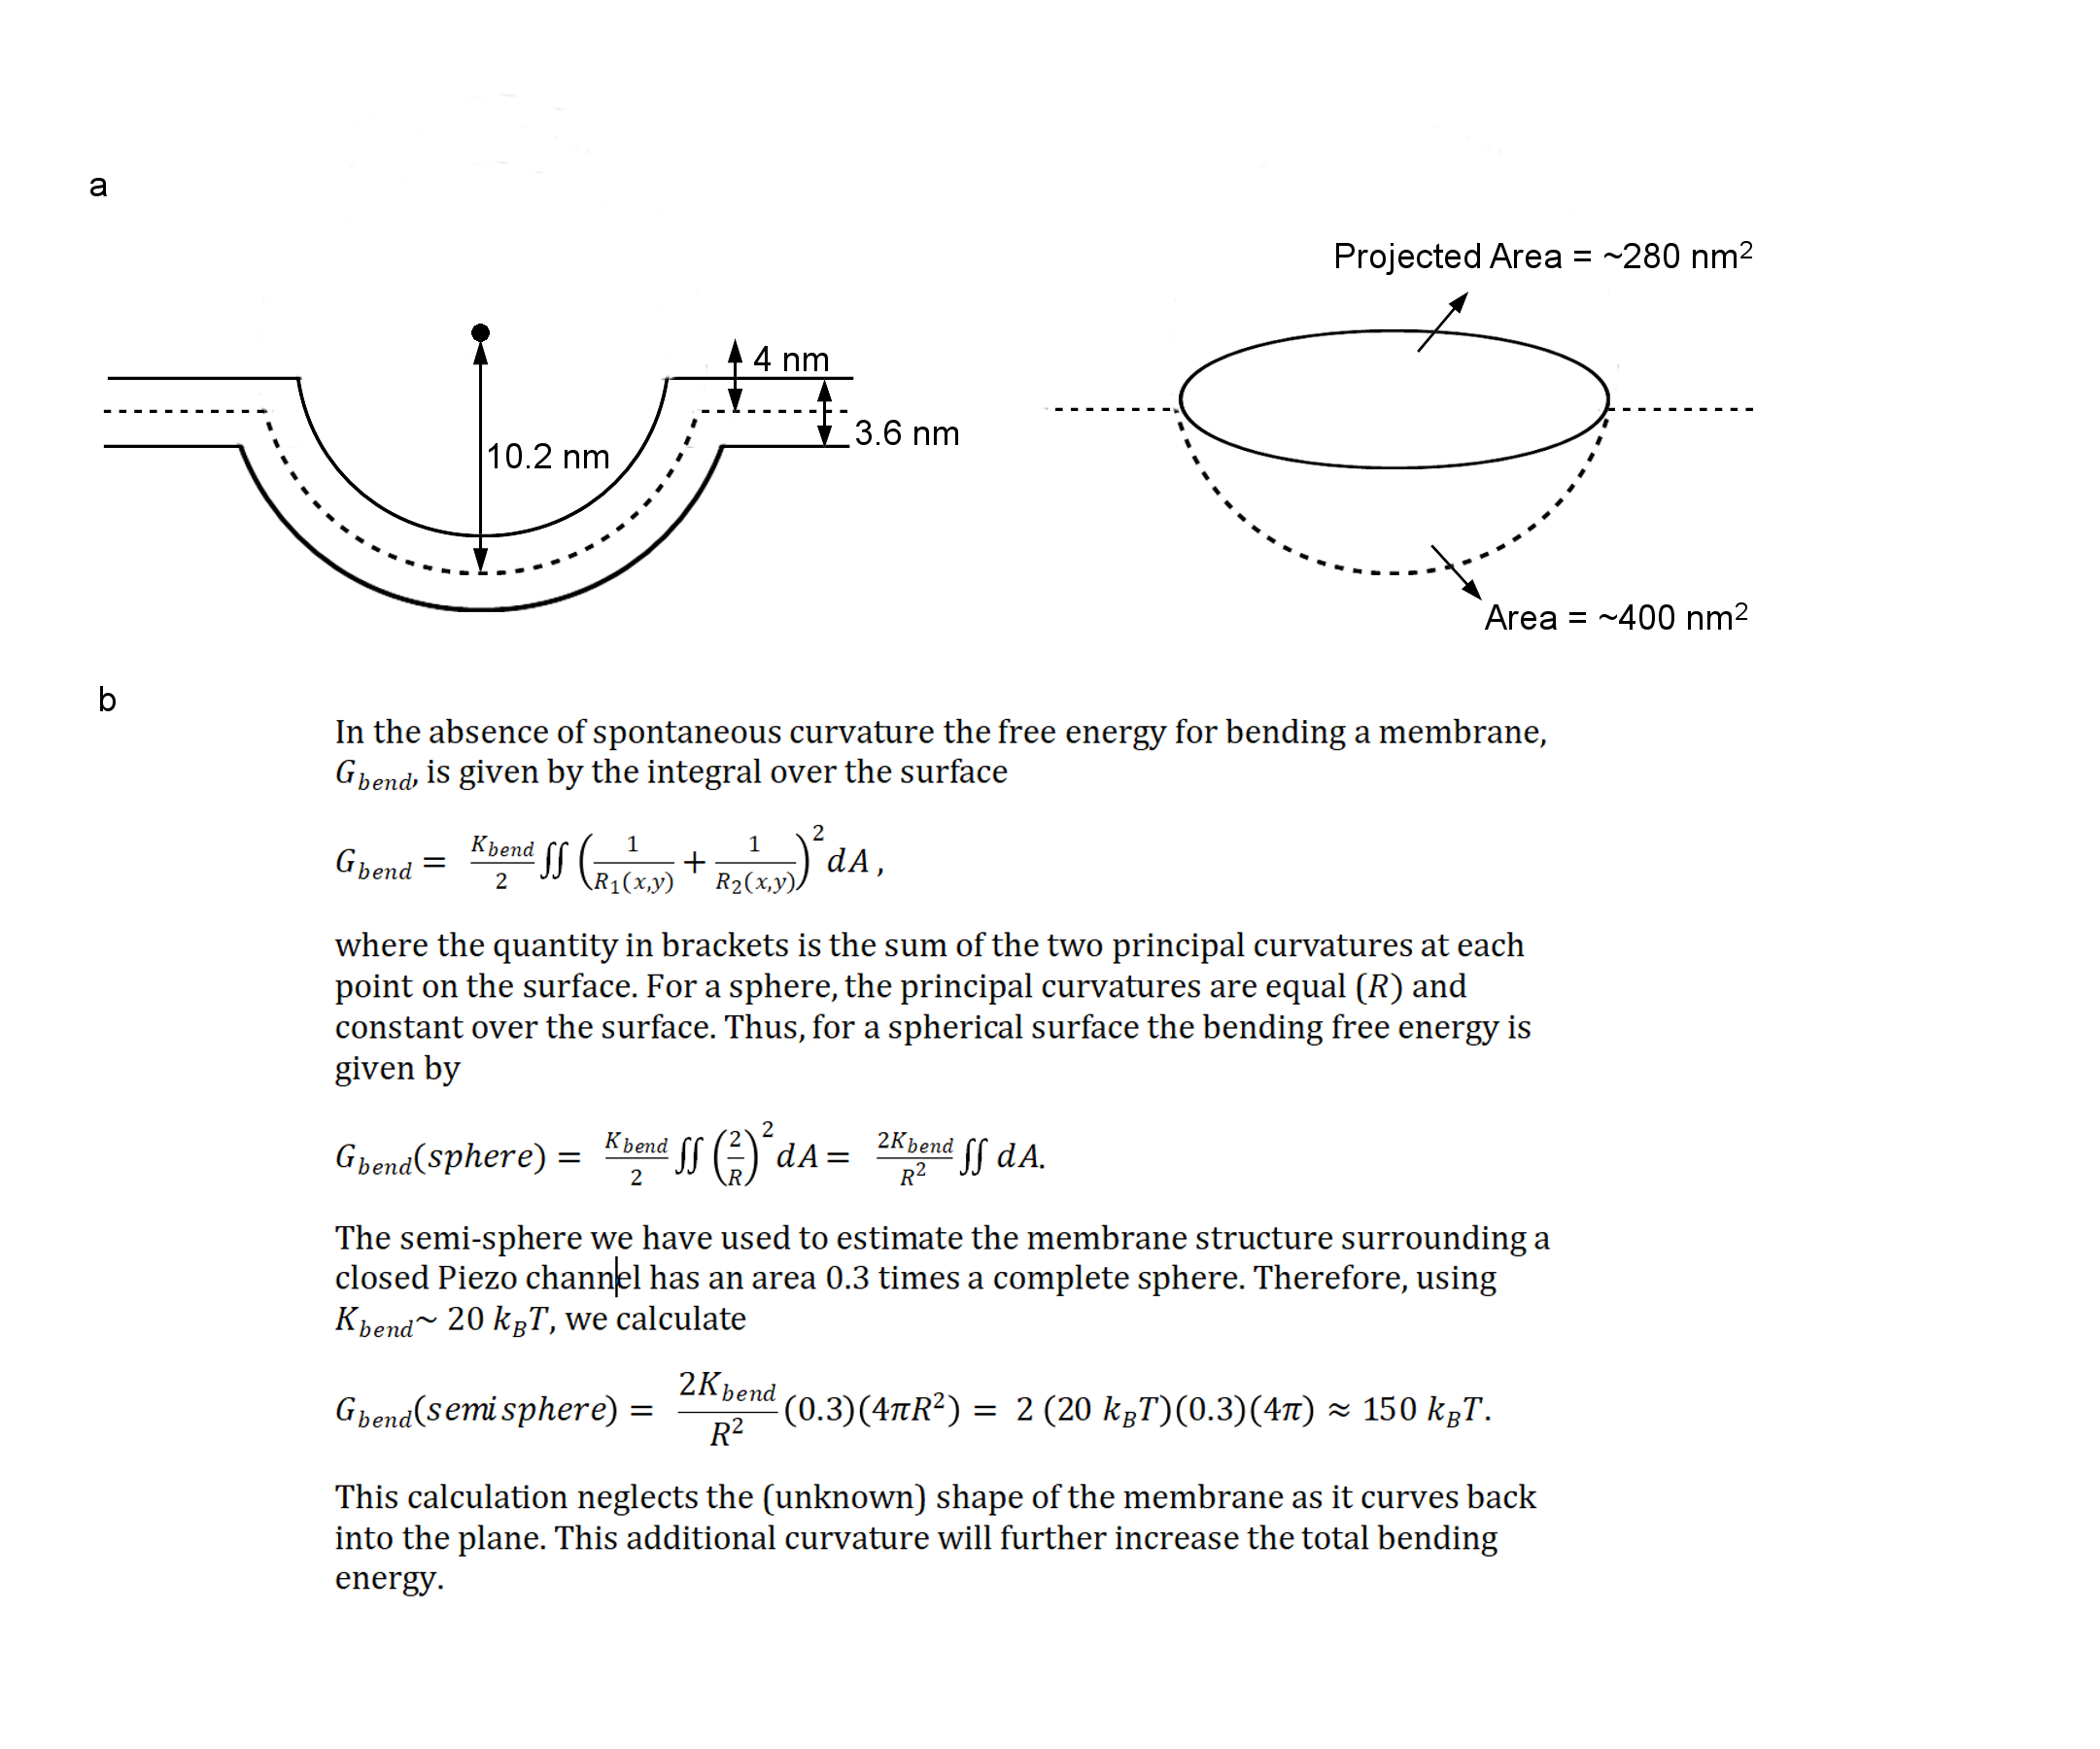

Supplement: supp [file elife-33660-supp-v1.zip › elife_poa_e33660_Figure_7_figure_supplement_1.tif]

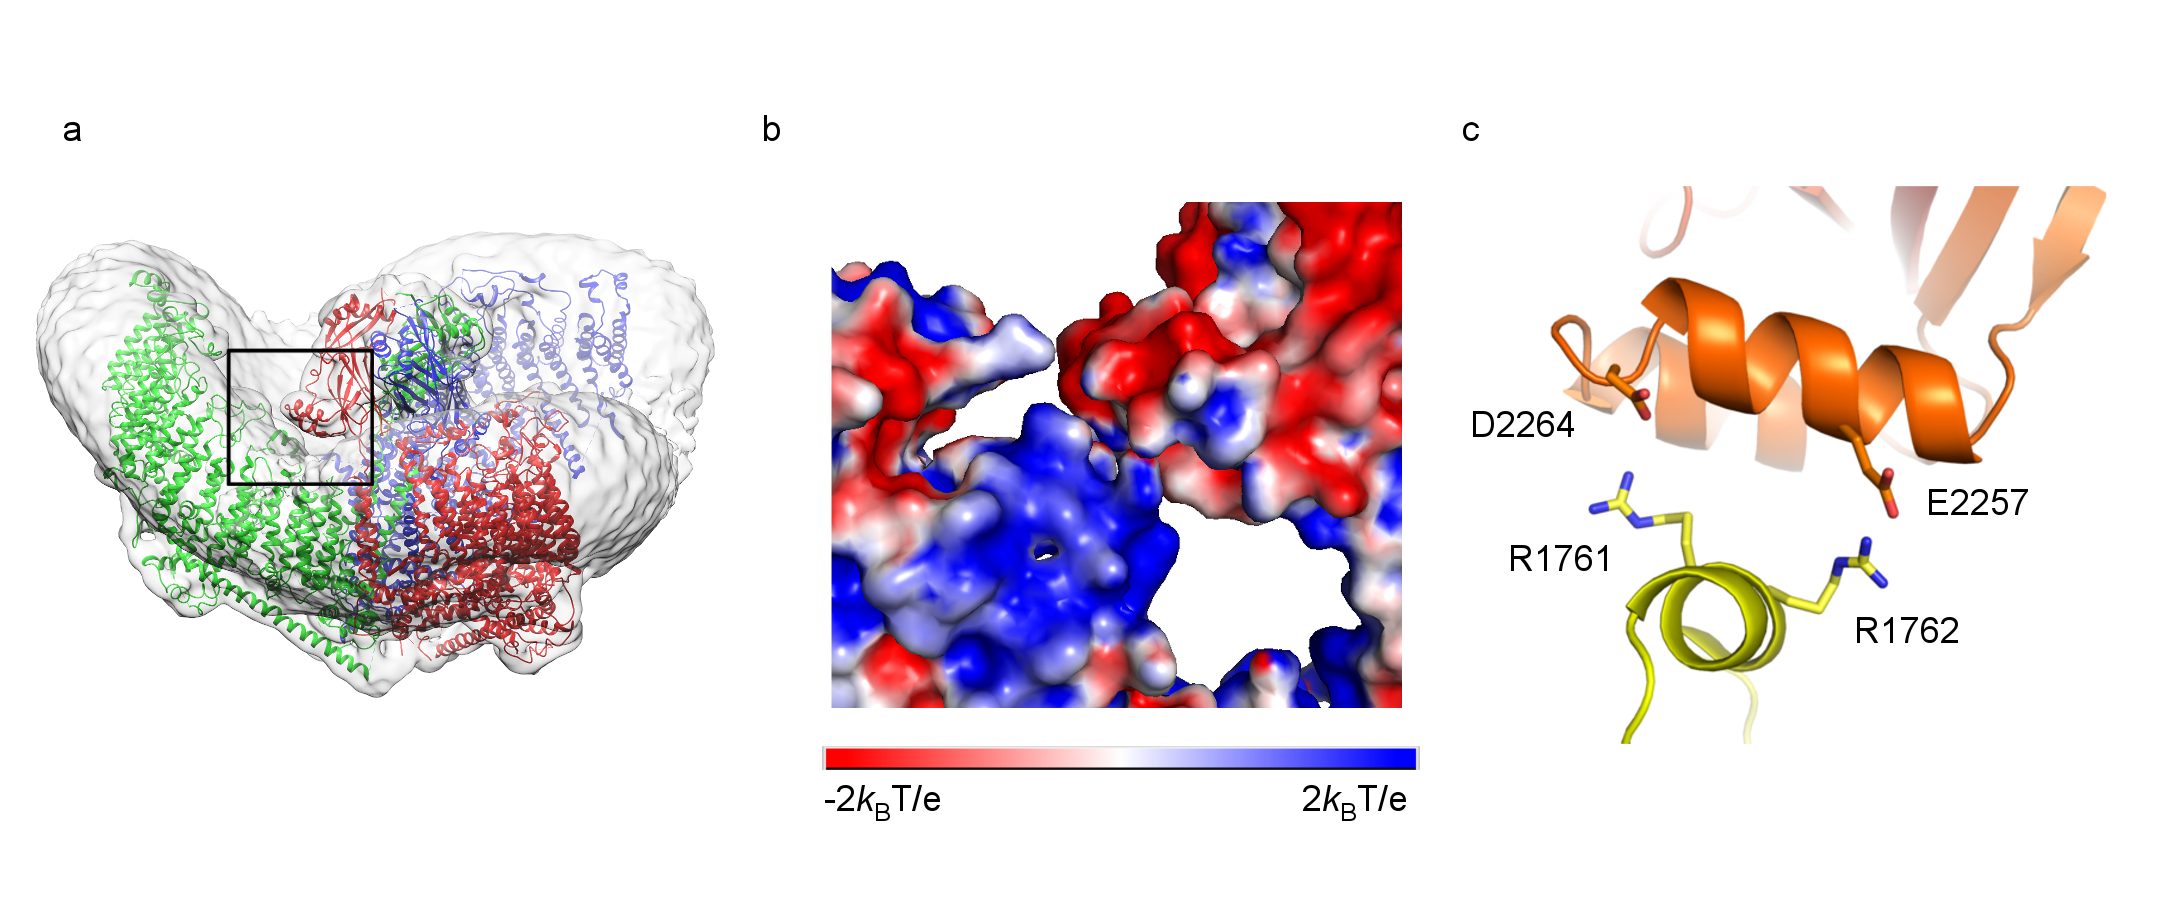

Supplement: supp [file elife-33660-supp-v1.zip › elife_poa_e33660_Figure_4_figure_supplement_1.tif]

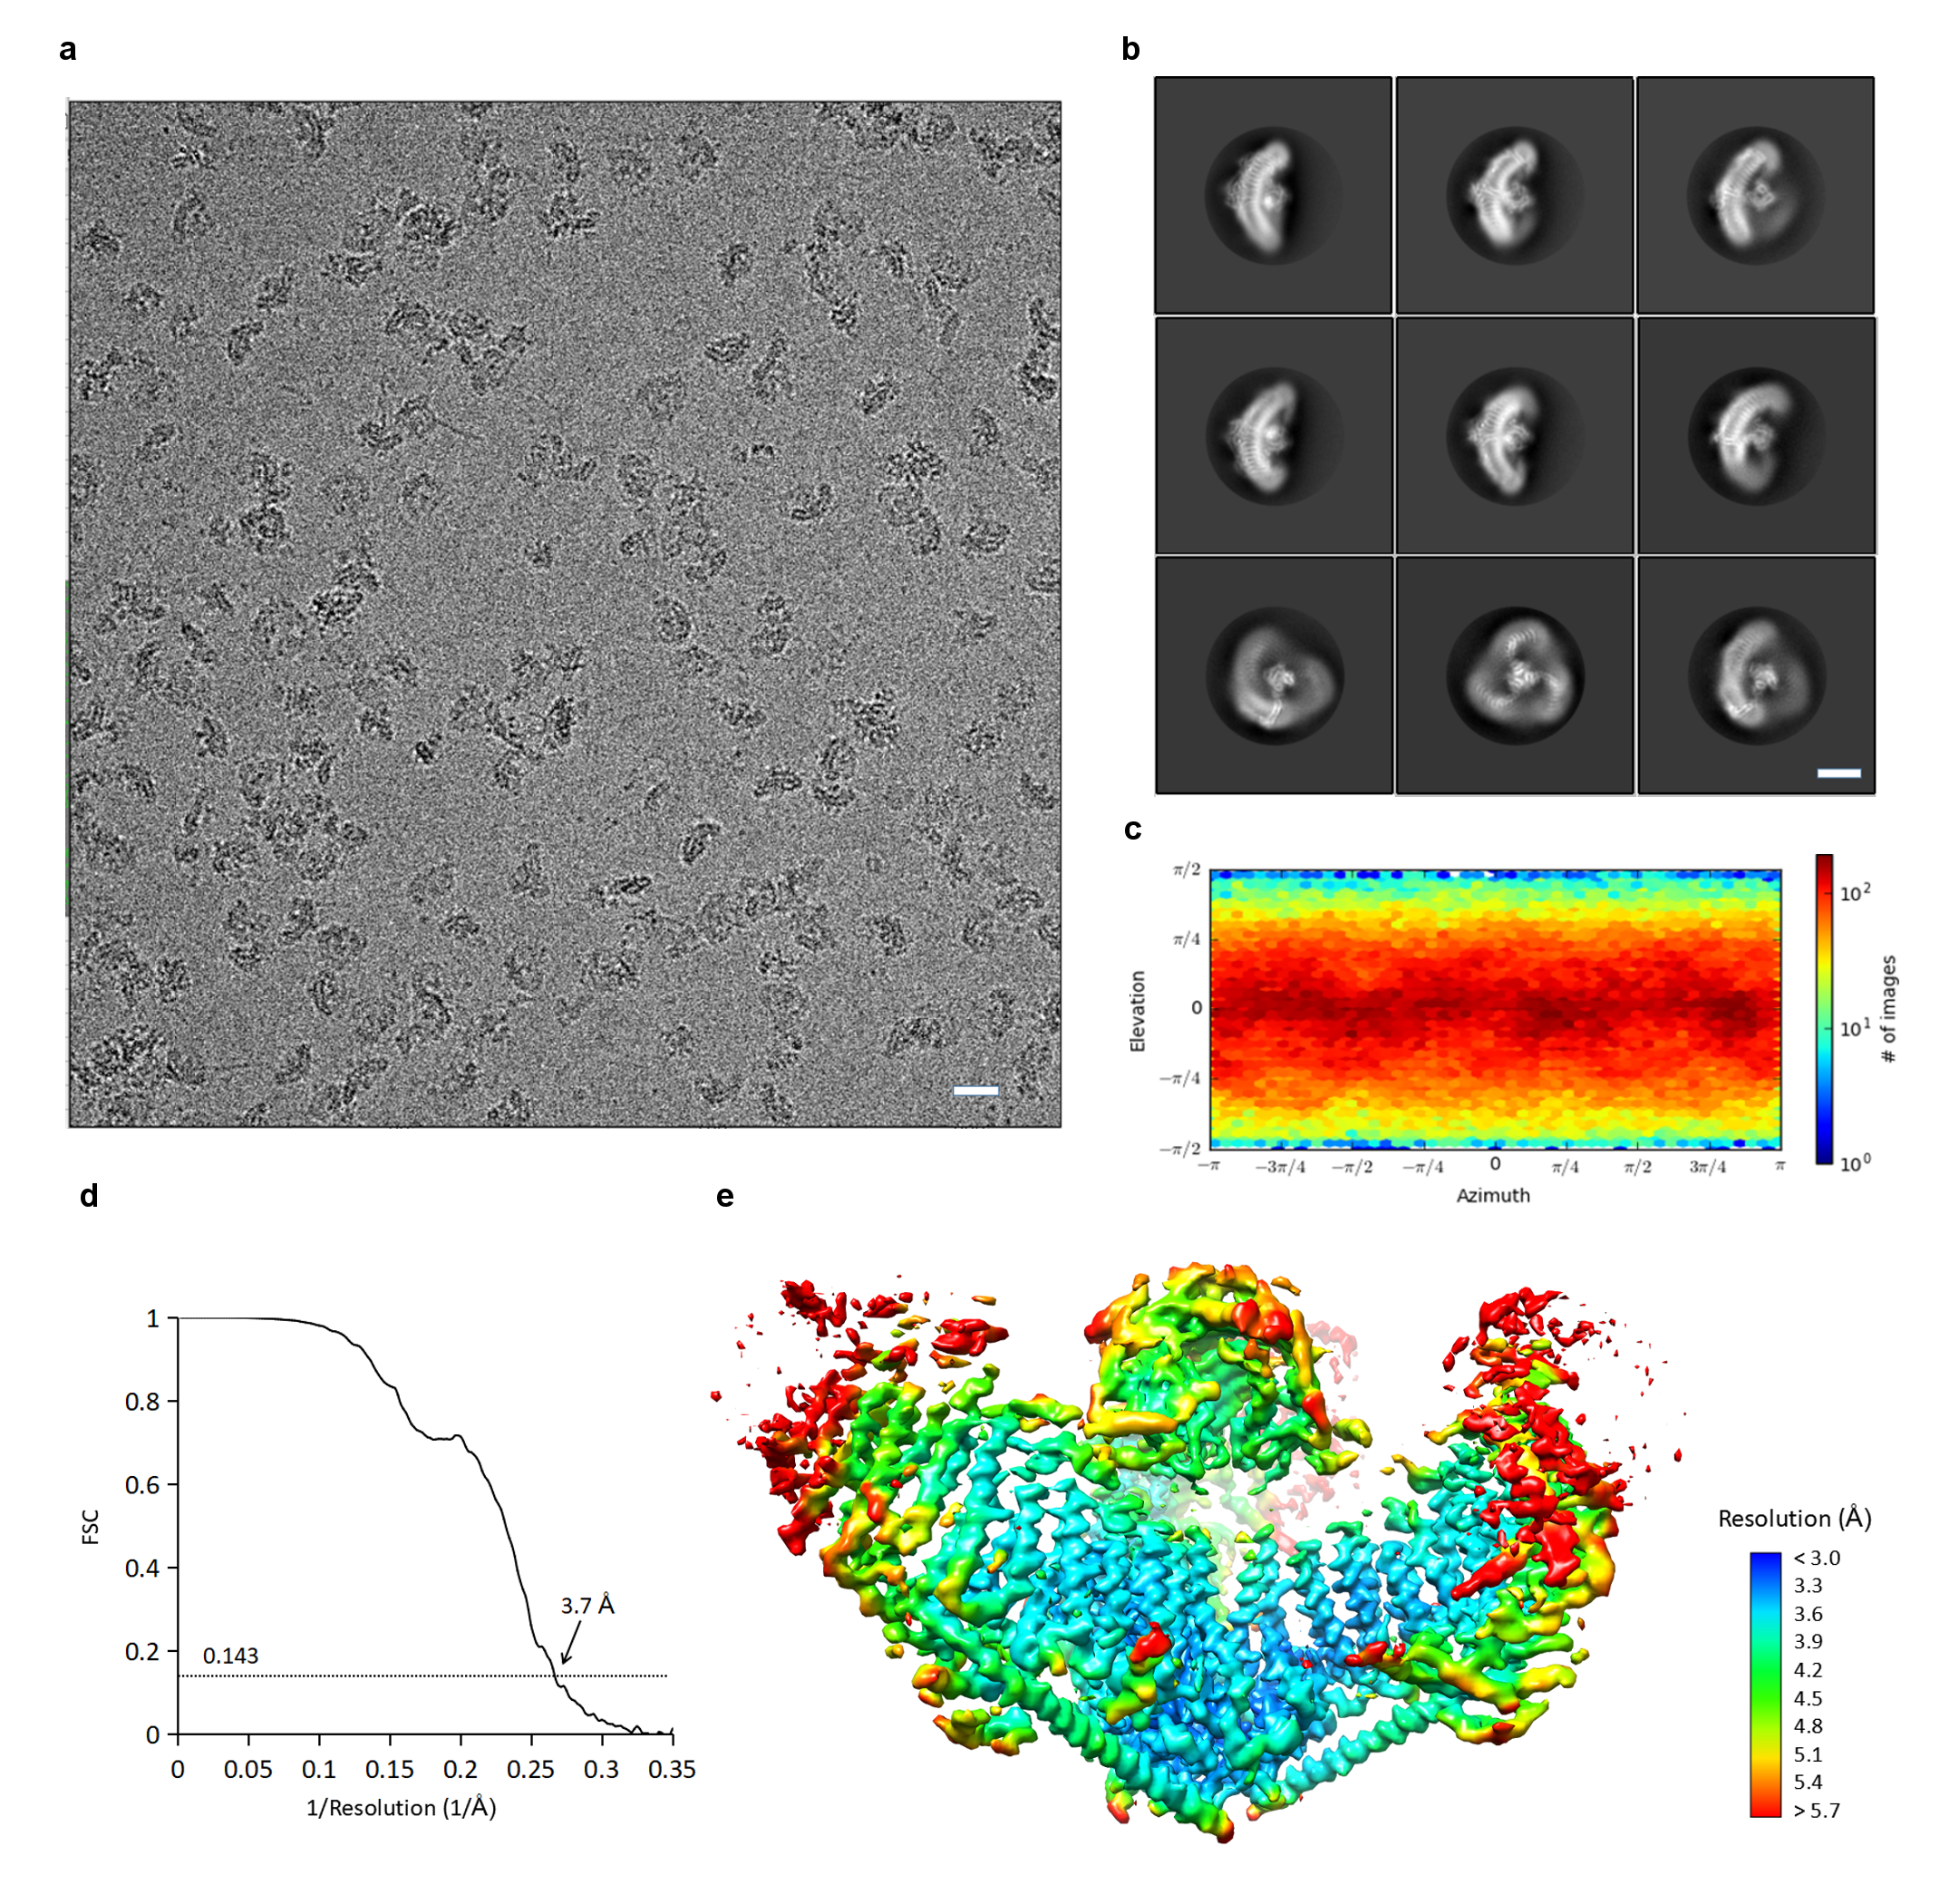

Supplement: supp [file elife-33660-supp-v1.zip › elife_poa_e33660_Figure_2_figure_supplement_1.tif]

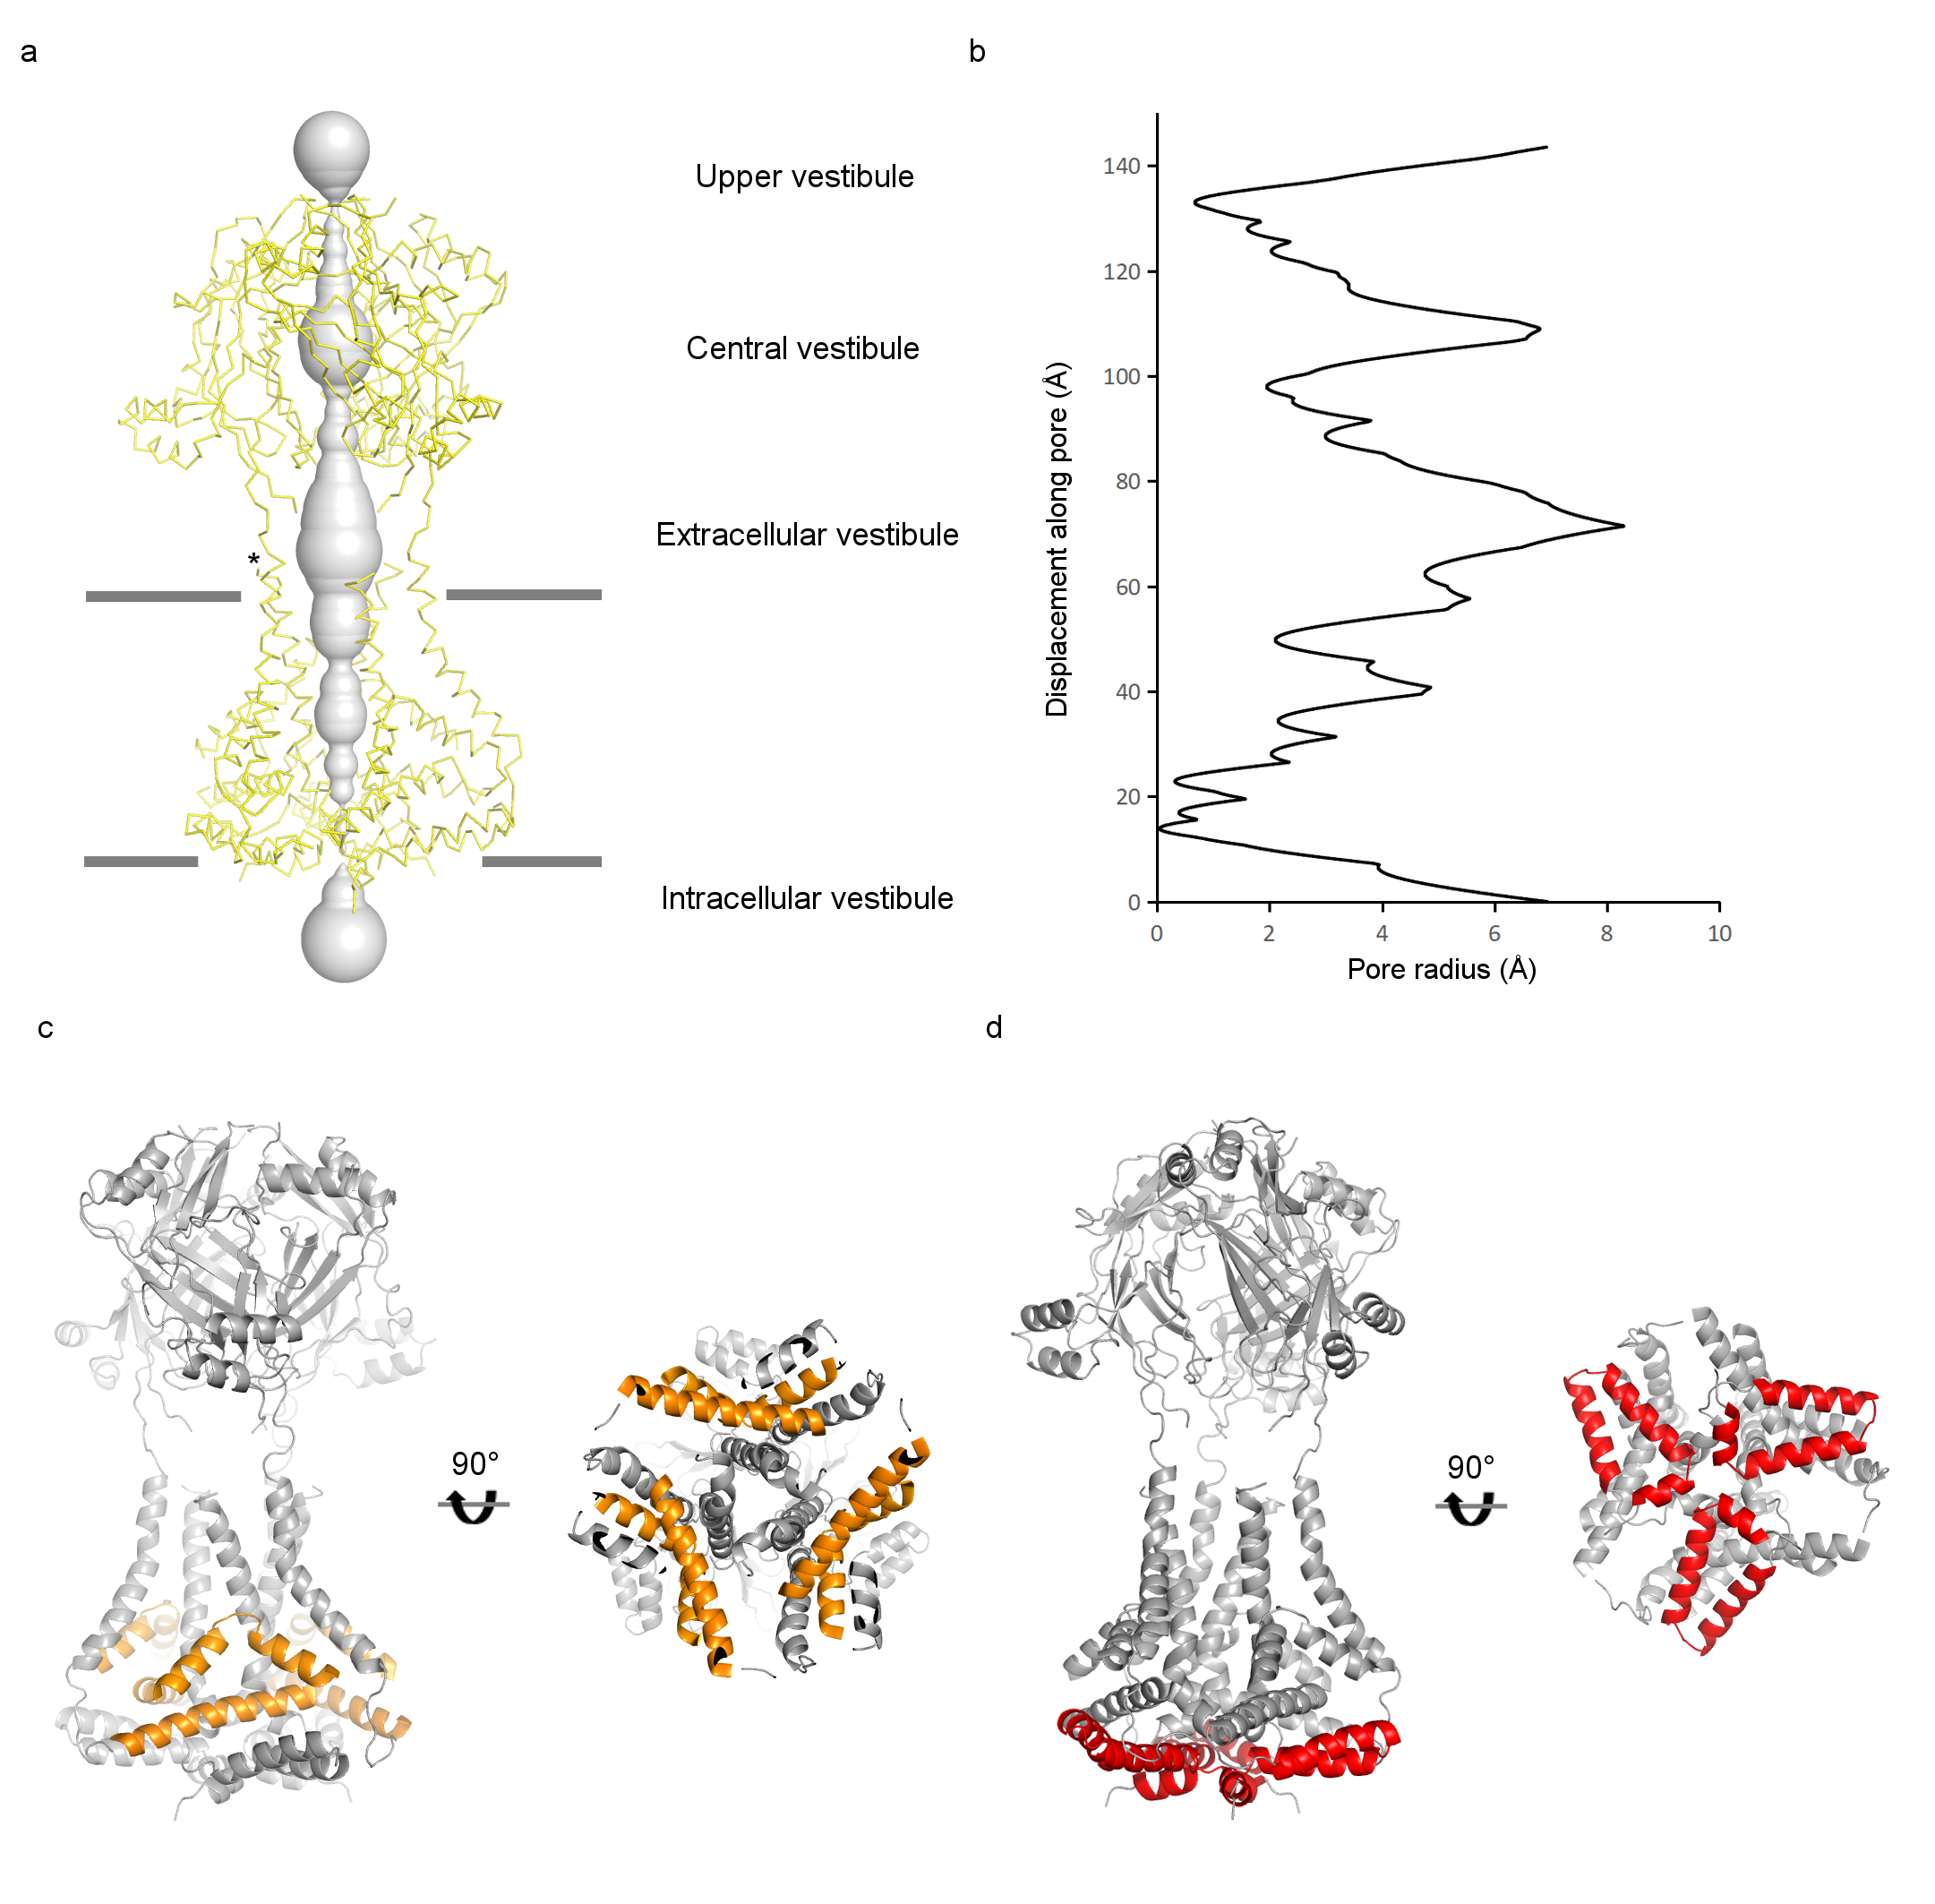

Supplement: supp [file elife-33660-supp-v1.zip › elife_poa_e33660_Figure_6_figure_supplement_1.tif]

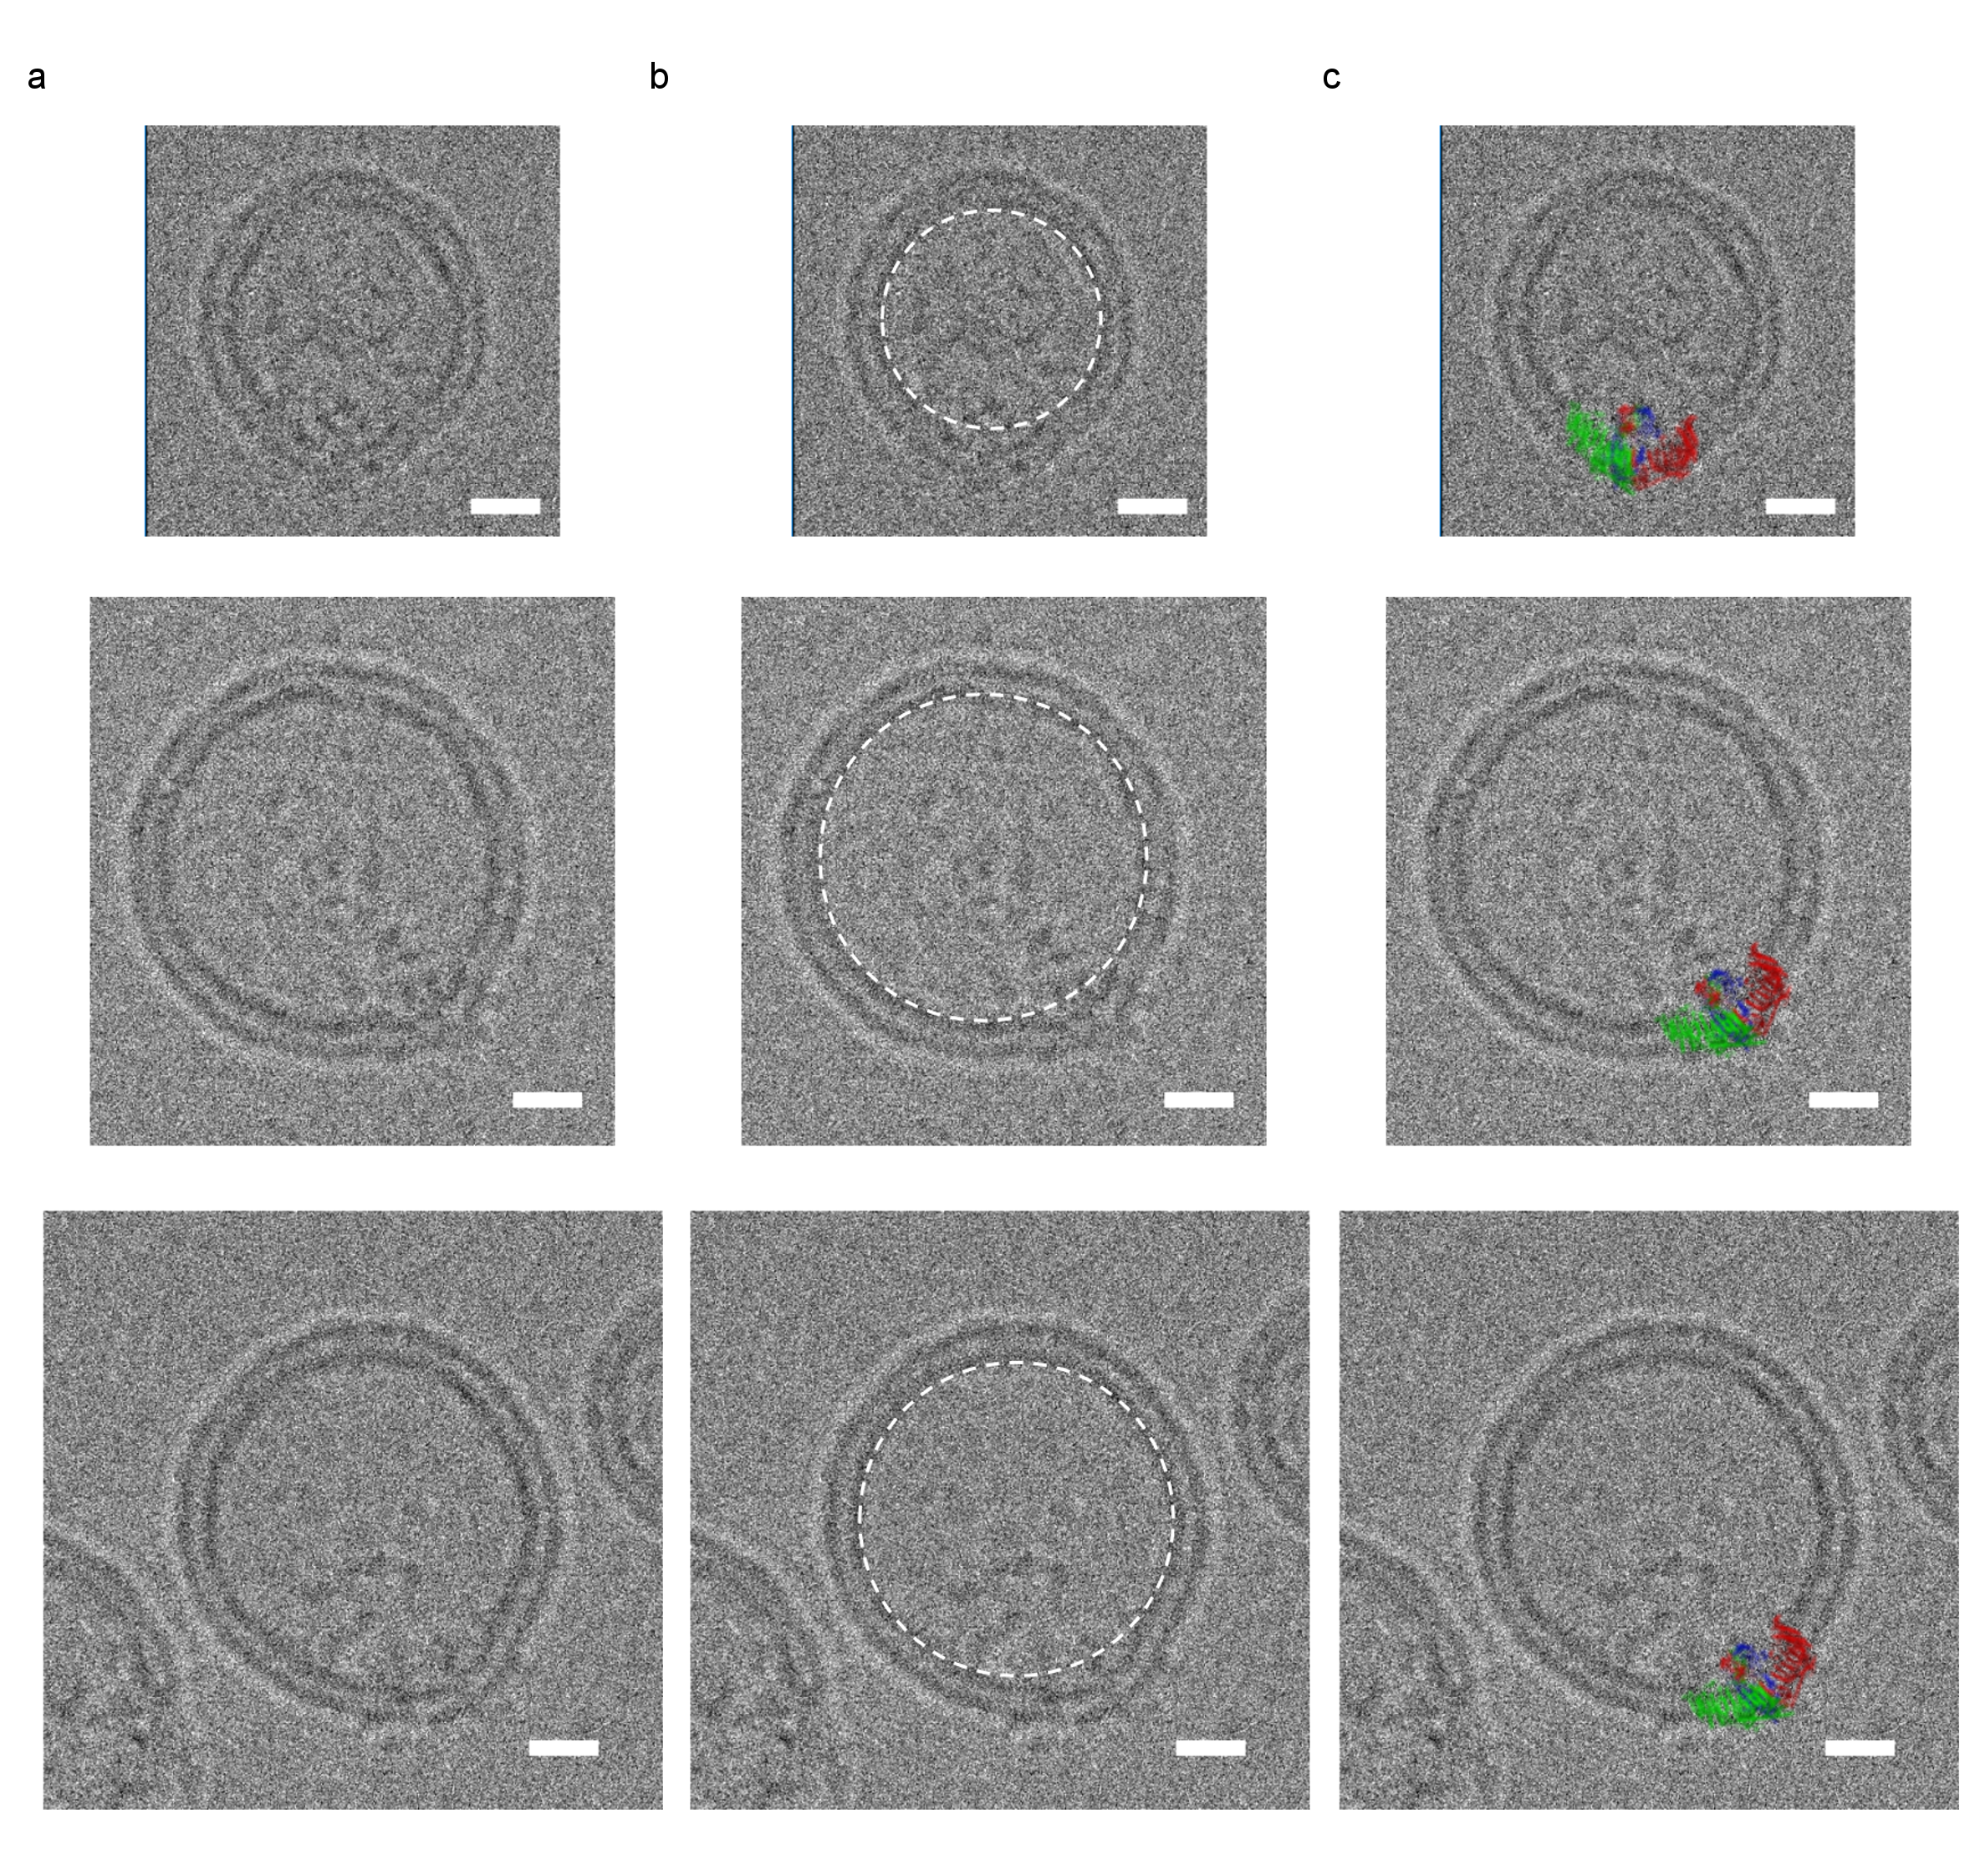

Supplement: supp [file elife-33660-supp-v1.zip › elife_poa_e33660_Figure_5_figure_supplement_1.tif]

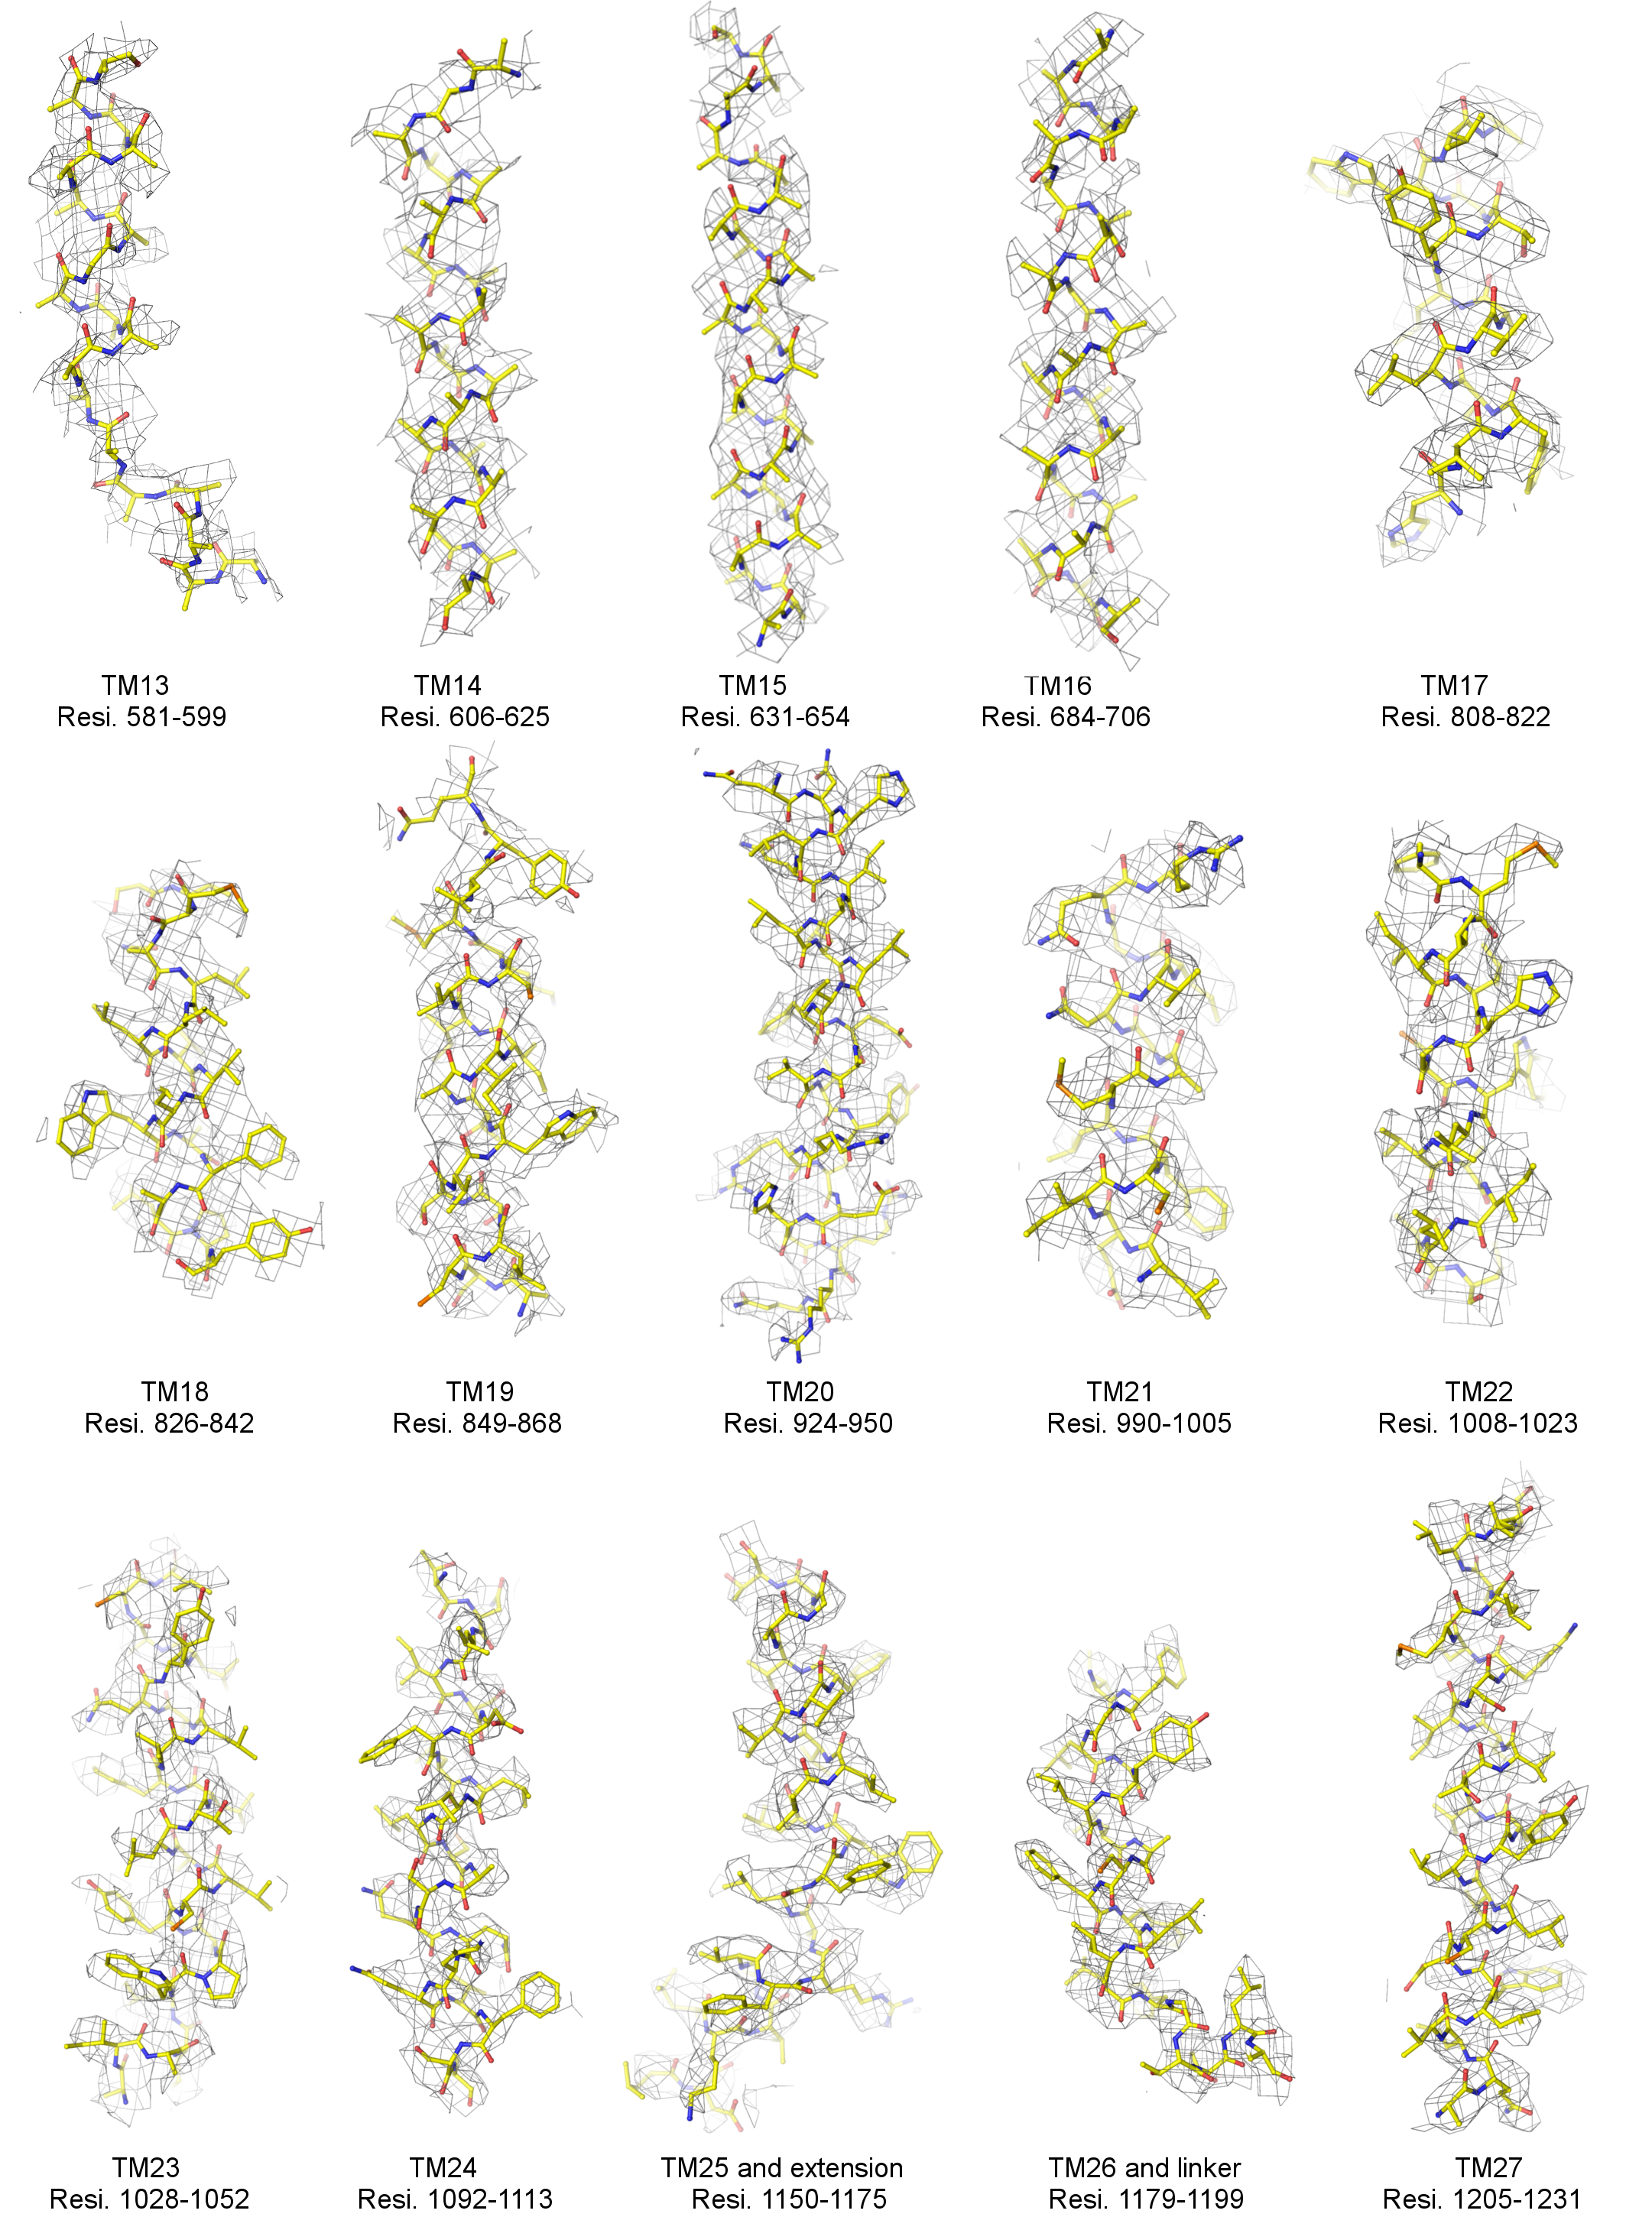

Supplement: supp [file elife-33660-supp-v1.zip › elife_poa_e33660_Figure_2_figure_supplement_2.tif]

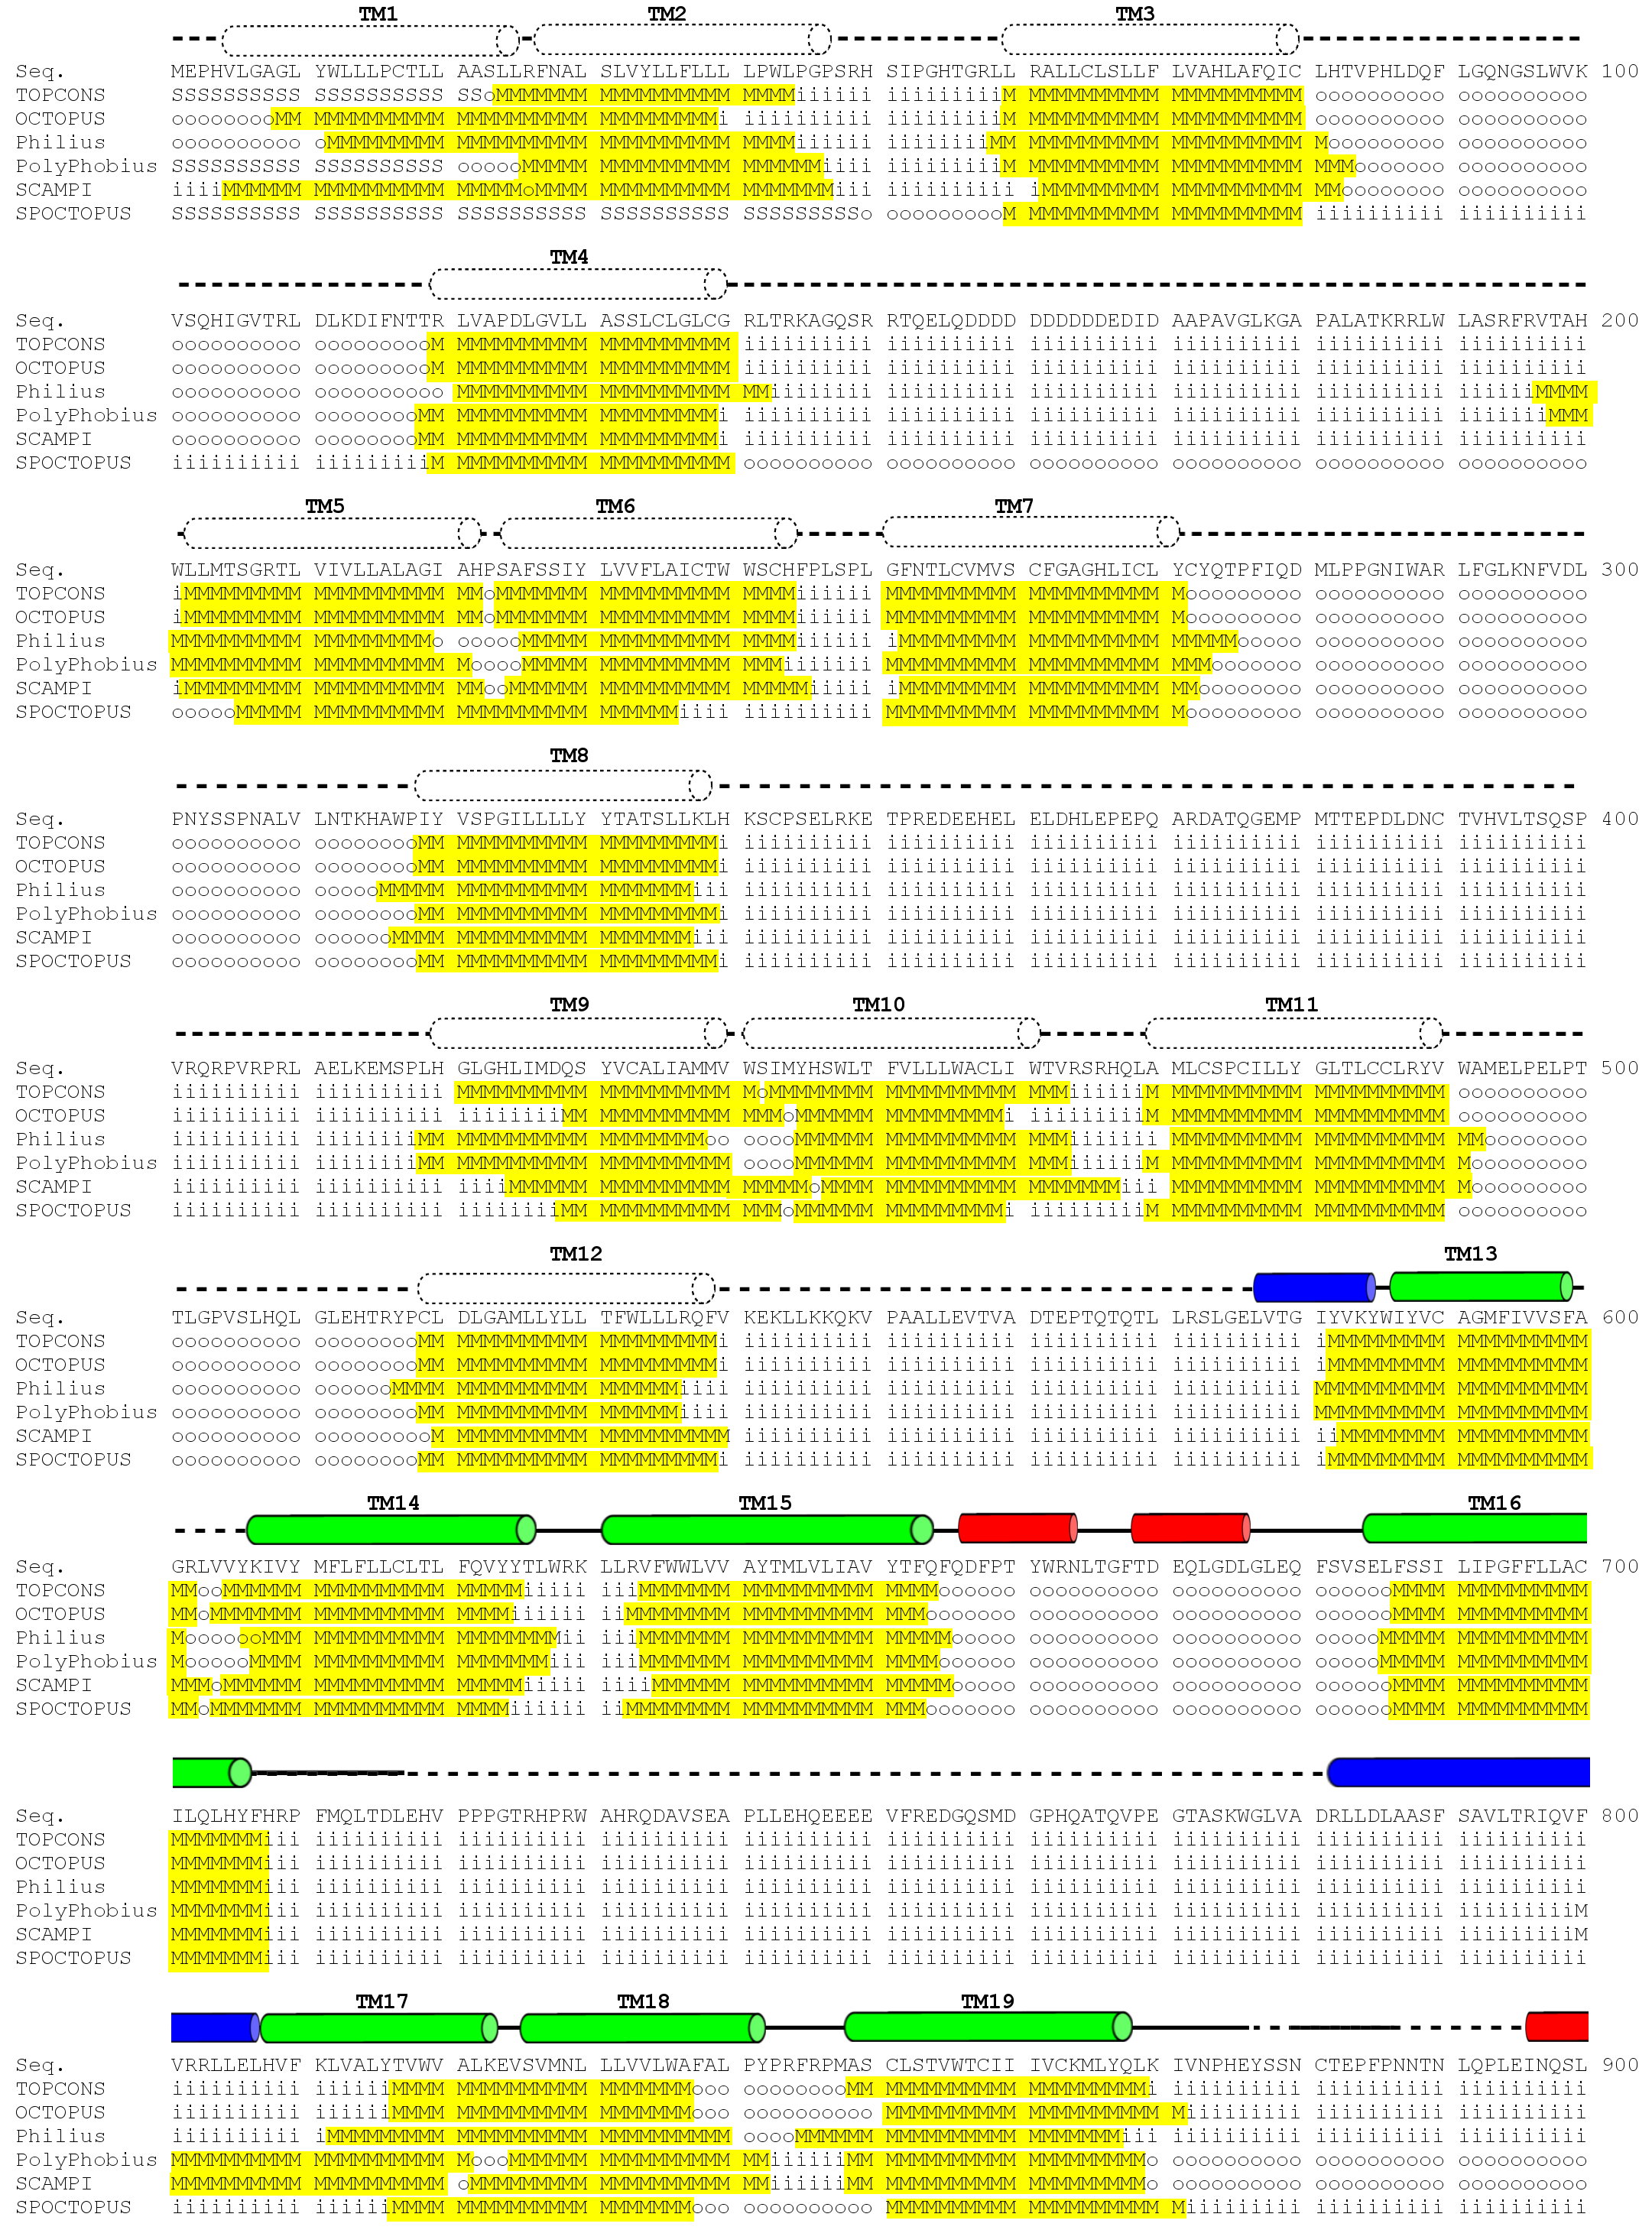

Supplement: supp [file elife-33660-supp-v1.zip › elife_poa_e33660_Figure_3_figure_supplement_1.tif]
